# Supplementary material for: Impact of the Immune Response Modification by Lysophosphatidylcholine in the Efficacy of Antibiotic Therapy of Experimental Sepsis and Pneumonia by Pseudomonas aeruginosa
Source: Preprints.org preprint supplement (doi:10.20944/preprints202002.0171.v1), 2020-02-13
Supplement: Supplementary file 2 [file supplementary]

**Supplemental data**

**Figure S1.** Protocol scheme of cytokines determination.

**Table S1. Pharmacokinetic and pharmacodynamic parameters of single doses of imipenem and ceftazidime**

| **Antimicrobial**  **(dose, route of administration** | **Drug** | **Cmax**  **(mg/L)** | **T1/2**  **(h)** | **AUC0-24h**  **(mg.h/L)** | ***T>MIC* (h, %)** | | **References** |
| --- | --- | --- | --- | --- | --- | --- | --- |
| **Pa39** | **Pa238** |
| IMP (30 mg/kg, im) | *t*IMP | 26.66 | 0.36 | 11.23 | 1.5, 37.5%a | 0, 0%b | 1 |
| CFZ (100 mg/kg, ip) | *f*CFZ | 107.14 | 1.08 | 126.83 | 6, 50%a | 1, 8.33%b | This study |

IMP, imipenem; *t*IMP: total imipenem,CFZ: ceftazidime*; f*CFZ: free ceftazidime; Cmax, maximum concentration of antimicrobial agent in serum; T1/2, elimination half-time; AUC0-24h, area under the concentration-time curve from time 0 to 24h; T>MIC, the time that drug concentration remains above the MIC; im: intramuscular ; ip: intraperitoneal.

aIMP and CFZ MICs: 1 mg/L.

bIMP and CFZ MICs: 32 and 64 mg/L, respectively.

1. Parra Millán, R.; Jiménez Mejías, M.E.; Sánchez Encinales, V.; Ayerbe Algaba, R.; Gutiérrez Valencia, A.; Pachón Ibáñez, M.E.; Díaz, C.; Pérez Del Palacio, J.; López Cortés, L.F.; Pachón, J.; Smani, Y. Efficacy of lysophosphatidylcholine in combination with antimicrobial agents against *Acinetobacter baumannii* in experimental murine peritoneal sepsis and pneumonia models. *Antimicrob. Agents Chemother.* **2016**, 60, 4464-4470.
